# Supplementary material for: Herpesvirus deconjugases inhibit the IFN response by promoting TRIM25 autoubiquitination and functional inactivation of the RIG-I signalosome
Source: PubMed Central journal article supplement (PMC5794190; doi:10.1371/journal.ppat.1006852), 2018-01-22
Supplement: ppat.1006852.s001.pdf [file ppat.1006852.s001.pdf]

**Table ST1. Primers used for qPCR.**

| Name            | Sequence: (5' to 3')     |
|-----------------|--------------------------|
| IFN $\beta$ Fwd | TCCAAATTGCTCTCCTGTTG     |
| IFN $\beta$ Rev | GCAGTATTCAAGCCTCCCAT     |
| RIG-I Fwd       | ATCCCAGTGTATGAACAGCAG    |
| RIG-I Rev       | GCCTGTAACTCTATAACCCATGTC |
| MDA5 Fwd        | TGGTCTCGTCACCAATGAAA     |
| MDA5 Rev        | CTCCTGAACCACTGTGAGCA     |
| GAPDH Fwd       | TGGGCTACACTGAGCACCAG     |
| GAPDH Rev       | GGGTGTCGCTGTTGAAGTCA     |
| BPLF1 Fwd       | GCAGTCCCCGGACATGAAAT     |
| BPLF1 Rev       | TTAGCCTGGCCTGGGTCATT     |
